# Supplementary material for: Mini-Tn7 vectors for stable expression of diguanylate cyclase PleD* in Gram-negative bacteria
Source: PubMed Central journal article supplement (PMC4587759; doi:10.1186/s12866-015-0521-6), 2015-09-29
Supplement: 12866_2015_521_MOESM1_ESM.pdf [file 12866_2015_521_MOESM1_ESM.pdf]

## Additional files

## Additional Tables:

**Table S1. Bacterial strains and plasmids used in this work**

| Strains                                          | Relevant characteristics                                                                                                                                                                                                                                                                                                                                                                                                       | Reference   |
|--------------------------------------------------|--------------------------------------------------------------------------------------------------------------------------------------------------------------------------------------------------------------------------------------------------------------------------------------------------------------------------------------------------------------------------------------------------------------------------------|-------------|
| <b>Rhizobial strains</b>                         |                                                                                                                                                                                                                                                                                                                                                                                                                                |             |
| <i>R. etli</i> CFN42                             | Wild type                                                                                                                                                                                                                                                                                                                                                                                                                      | [1]         |
| Ret Tn7Km                                        | CFN42 mini-Tn7Km, Km <sup>R</sup>                                                                                                                                                                                                                                                                                                                                                                                              | This work   |
| Ret Tn7pleD*Km                                   | CFN42 mini-Tn7pleD*Km, Km <sup>R</sup>                                                                                                                                                                                                                                                                                                                                                                                         | This work   |
| Ret Tn7Tc                                        | CFN42 mini-Tn7Tc, Tc <sup>R</sup>                                                                                                                                                                                                                                                                                                                                                                                              | This work   |
| Ret Tn7pleD*Tc                                   | CFN42 mini-Tn7pleD*Tc, Tc <sup>R</sup>                                                                                                                                                                                                                                                                                                                                                                                         | This work   |
| Ret Tn7pleD*                                     | CFN42 mini-Tn7pleD*                                                                                                                                                                                                                                                                                                                                                                                                            | This work   |
| <i>R. leguminosarum</i> bv. <i>viciae</i> UPM791 | Wild type, Sm <sup>R</sup>                                                                                                                                                                                                                                                                                                                                                                                                     | [2]         |
| Rle Tn7Km                                        | UPM791 mini-Tn7Km, Km <sup>R</sup>                                                                                                                                                                                                                                                                                                                                                                                             | This work   |
| Rle Tn7pleD*Km                                   | UPM791 mini-Tn7pleD*Km, Km <sup>R</sup>                                                                                                                                                                                                                                                                                                                                                                                        | This work   |
| Rle Tn7Tc                                        | UPM791 mini-Tn7Tc, Tc <sup>R</sup>                                                                                                                                                                                                                                                                                                                                                                                             | This work   |
| <i>S. meliloti</i> 8530                          | ExpR <sup>+</sup> derivative of Rm1021, Sm <sup>R</sup>                                                                                                                                                                                                                                                                                                                                                                        | [3]         |
| Sme Tn7Km                                        | 8530 mini-Tn7Km, Km <sup>R</sup>                                                                                                                                                                                                                                                                                                                                                                                               | This work   |
| Sme Tn7pleD*Km                                   | 8530 mini-Tn7pleD*Km, Km <sup>R</sup>                                                                                                                                                                                                                                                                                                                                                                                          | This work   |
| Sme Tn7Tc                                        | 8530 mini-Tn7Tc, Tc <sup>R</sup>                                                                                                                                                                                                                                                                                                                                                                                               | This work   |
| Sme Tn7pleD*Tc                                   | 8530 mini-Tn7pleD*Tc, Tc <sup>R</sup>                                                                                                                                                                                                                                                                                                                                                                                          | This work   |
| <b>Pseudomonas strains</b>                       |                                                                                                                                                                                                                                                                                                                                                                                                                                |             |
| <i>P. syringae</i> pv. <i>tomato</i> DC3000      | Rif <sup>R</sup>                                                                                                                                                                                                                                                                                                                                                                                                               | [4]         |
| Pto Tn7Km                                        | DC3000 mini-Tn7Km, Km <sup>R</sup>                                                                                                                                                                                                                                                                                                                                                                                             | This work   |
| Pto Tn7pleD*Km                                   | DC3000 mini-Tn7pleD*Km, Km <sup>R</sup>                                                                                                                                                                                                                                                                                                                                                                                        | This work   |
| Pto Tn7Tc                                        | DC3000 mini-Tn7Tc, Tc <sup>R</sup>                                                                                                                                                                                                                                                                                                                                                                                             | This work   |
| Pto Tn7pleD*Tc                                   | DC3000 mini-Tn7pleD*Tc, Tc <sup>R</sup>                                                                                                                                                                                                                                                                                                                                                                                        | This work   |
| <b><i>E. coli</i> strains</b>                    |                                                                                                                                                                                                                                                                                                                                                                                                                                |             |
| TOP10                                            | <i>F</i> <sup>-</sup> <i>mcrA</i> $\Delta$ ( <i>mrr-hsdRMS-mcrBC</i> ) $\Phi$ 80 <i>lacZ</i> $\Delta$ M15 $\Delta$ <i>lacX74 recA1</i> , <i>araD139</i> , $\Delta$ ( <i>ara-leu</i> )7697, <i>galU</i> , <i>galK</i> , <i>rpsL</i> ( <i>Str</i> <sup>r</sup> ) <i>endA1</i> , <i>nupG</i> $\lambda$ -MG1655:: <i>AdapA</i> ::( <i>erm-pir</i> )RP4-2, <i>Tc</i> :: <i>Mu</i> , <i>Km</i> <sup>r</sup> , <i>Em</i> <sup>r</sup> | Invitrogen® |
| $\beta$ 2163                                     | <i>RP4-2-Tc</i> :: <i>Mu</i> $\Delta$ <i>dapA</i> ::( <i>erm-pir</i> )                                                                                                                                                                                                                                                                                                                                                         | [5]         |
| $\beta$ 2155                                     | <i>RP4-2-Tc</i> :: <i>Mu</i> $\Delta$ <i>dapA</i> ::( <i>erm-pir</i> ) <i>thrB1004</i> , <i>pro</i> , <i>thi</i> , <i>strA</i> , <i>hsdS</i> , <i>lacZ</i> $\Delta$ M15, ( <i>F'</i> <i>lacZ</i> $\Delta$ M15, <i>lacIq</i> , <i>traD36</i> , <i>proA</i> <sup>+</sup> , <i>proB</i> <sup>+</sup> ) <i>Km</i> <sup>r</sup> , <i>Sm</i> <sup>r</sup> , <i>Em</i> <sup>r</sup>                                                   | [5]         |
| <b>Plasmids</b>                                  |                                                                                                                                                                                                                                                                                                                                                                                                                                |             |
| pJB3Tc19                                         | IncP, cloning vector Ap <sup>R</sup> , Tc <sup>R</sup>                                                                                                                                                                                                                                                                                                                                                                         | [6]         |
| pJBpleD*                                         | pJB3Tc19 bearing <i>pleD</i> * gene                                                                                                                                                                                                                                                                                                                                                                                            | [7]         |
| pCR®-XL-TOPO®                                    | Cloning vector, Km <sup>R</sup>                                                                                                                                                                                                                                                                                                                                                                                                | Invitrogen® |
| pTOPO-pleD*                                      | pCR®-XL-TOPO® with a 1784 bp fragment containing <i>pleD</i> *, Km <sup>R</sup>                                                                                                                                                                                                                                                                                                                                                | This work   |
| pUC18T-mini-Tn7T                                 | pUC18 with mini-Tn7 transposon, Ap <sup>R</sup> ,                                                                                                                                                                                                                                                                                                                                                                              | [8]         |

|                       |                                                                                                           |             |
|-----------------------|-----------------------------------------------------------------------------------------------------------|-------------|
| mini-Tn7pleD*         | pUC18T-mini-Tn7T with the EcoRI/SacI fragment containing <i>pleD*</i> Ap <sup>R</sup> ,                   | This work   |
| mini-Tn7pleD*Km       | mini-Tn7pleD* with 1.2 Kb KpnI fragment containing Km marker Ap <sup>R</sup> , Km <sup>R</sup> ,          | This work   |
| mini-Tn7Km            | mini-Tn7pleD*Km with a 1114 bp NcoI internal deletion of <i>pleD*</i> Ap <sup>R</sup> , Km <sup>R</sup> , | This work   |
| mini-Tn7pleD*Tc       | mini-Tn7pleD* with 1.3 Kb KpnI fragment containing Tc marker Ap <sup>R</sup> , Tc <sup>R</sup>            | This work   |
| mini-Tn7Tc            | mini-Tn7pleD*Tc with a 1114 bp NcoI internal deletion, Ap <sup>R</sup> , Tc <sup>R</sup>                  | This work   |
| pUX-BF13              | Helper plasmid providing the Tn7 transposition functions in trans, Ap <sup>R</sup> , mob+, ori-R6K        | [9]         |
| p34S-Tc               | Plasmid containing a Tc marker, Tc <sup>R</sup>                                                           | [10]        |
| P34S-Km               | Plasmid containing a Km marker, Km <sup>R</sup>                                                           | [10]        |
| pQE-80L               | Expression vector, Ap <sup>R</sup>                                                                        | Invitrogen® |
| pBBR1MCS-5            | Cloning vector, Gm <sup>R</sup>                                                                           | [11]        |
| pBBRlacI <sup>q</sup> | pBBR1MCS-5 with a McsI 1610 bp fragment containing the <i>lacI<sup>q</sup></i> gene, Gm <sup>R</sup>      | This work   |

---

**Table S2. Primers used in this work.**

| Name              | Sequence 5'-3'          | Used in                                                     |
|-------------------|-------------------------|-------------------------------------------------------------|
| pJB3Tc19-F        | GCCTCTTCGCTATTACGCC     | <i>pleD</i> * amplification from pJB <i>pleD</i> *          |
| <i>pleD</i> Tn7   | GAGCTCACGCAAACCGCCTCTCC |                                                             |
| pTn7L             | ATTAGCTTACGACGCTACACCC  | Verification of insertion under <i>glmS</i> region          |
| pTn7R             | CACAGCATAACTGGACTGATTTC |                                                             |
| <i>glmS</i> 1etF  | CCTGTTATCGTCATTGCTCC    | Verification of insertion in Ret under <i>glmS</i> 1 region |
| <i>glmS</i> 1etR  | CGACAGCAATCAGCAGGC      |                                                             |
| <i>glmS</i> _pstF | TGGCGAACTCAAACACGG      | Verification of insertion in Pto under <i>glmS</i> region   |
| <i>glmS</i> _pstR | TACCGAGTAGAACCTCCTTAGC  |                                                             |
| <i>glmS</i> _legF | CCTGTCATCGTCATCGCC      | Verification of insertion in Rle under <i>glmS</i> region   |
| <i>glmS</i> _legR | GCACGACGGCGATCAGC       |                                                             |
| <i>glmS</i> _rmF  | CCACGCCGAAGGTTACG       | Verification of insertion in Sm under <i>glmS</i> region    |
| <i>glmS</i> _rmR  | AGGCTCGTTGCGGAACC       |                                                             |
| Rm_NodM           | GCGAGGTCAGTGTAGAACG     | Verification of insertion in Sm under <i>nodM</i> region    |
| RT_pleDF          | AATGTCCGCCTGCTTGA       | <i>pleD</i> * expression by qRT-PCR                         |
| RT_pleDR          | CAGAATGATGTCGGGCAG      |                                                             |
| Rm 16S F          | TCTACGGAATAACGCAGG      | 16S rRNA gene of Sme for qRT-PCR                            |
| Rm 16S R          | GTGTCTCAGTCCCAATGT      |                                                             |
| F-RT-16S          | ACACCGCCCGTCACACCA      | 16S rRNA gene of Pto for qRT-PCR                            |
| R-RT-16S          | GTTCCCCTACGGCTACCTT     |                                                             |

## Additional Figures

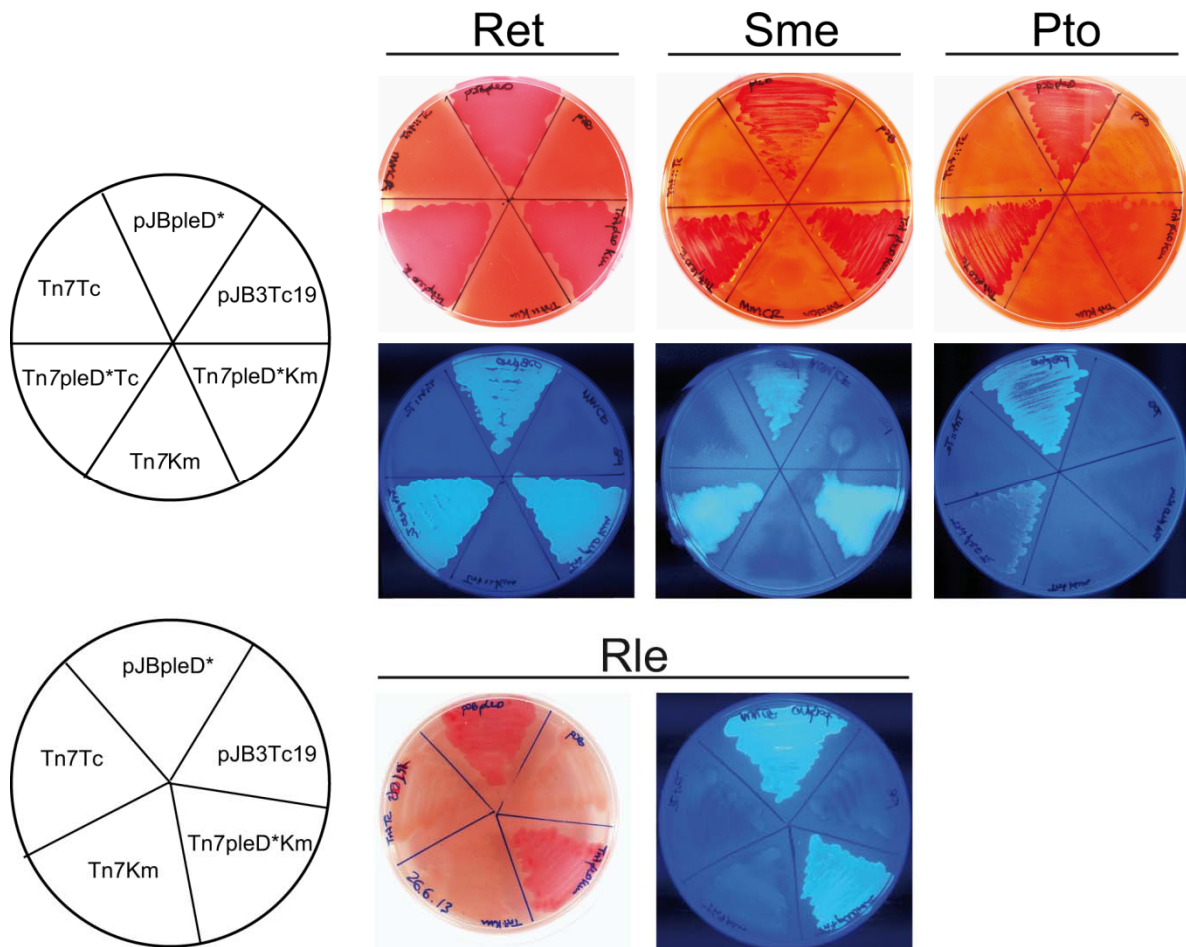

**Figure S1. Congo red (CR) and calcofluor (CF) staining of *R. etli* CFN42 (Ret), *S. meliloti* 8530 (Sme), *R. leguminosarum* bv. *viciae* UPM791 (Rle) and *P. syringae* pv. *tomato* DC3000 (Pto) expressing *pleD\** in single and multiple copies and their respective control strains. Bacteria were grown on solid YGT, for Rle, or MM plates, for the rest of the strains, supplemented with congo red (CR; 125  $\mu\text{g/ml}$ ) or with calcofluor (CF; 200  $\mu\text{g/ml}$ ). Calcofluor binding was observed under UV light. CR and CF plates were photographed after 3 days incubation at 28°C for rhizobial strains and for *Pseudomonas*.**

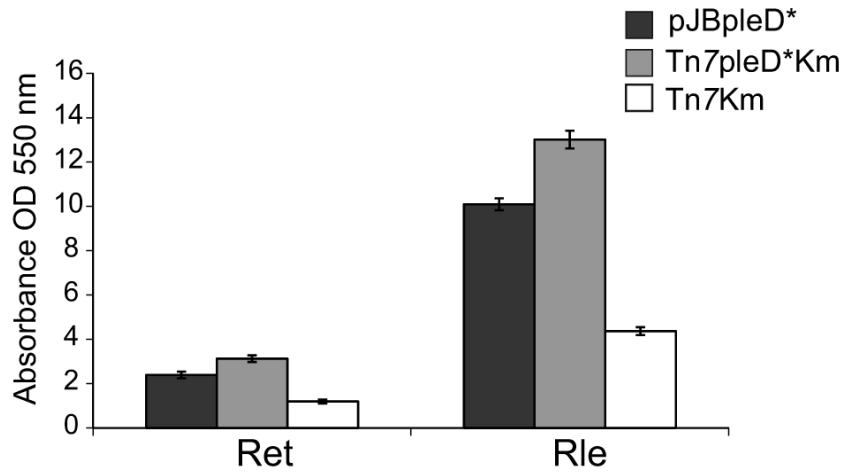

**Figure S2. Biofilm formation** by *Rhizobium etli* CFN42 (Ret) and *Rhizobium leguminosarum* bv. *viciae* UPM791 (Rle) strains expressing *pleD\** in multicopy (pJBpleD\*), single copy (Tn7pleD\*Km) and the control strain without *pleD\** (Tn7Km). Quantification of biofilm formation by crystal violet (CV) after 72h of growth in MM in a 96-well plate at 28 °C. Bars represent the mean of eight wells from three biological replicates  $\pm$  standard error.

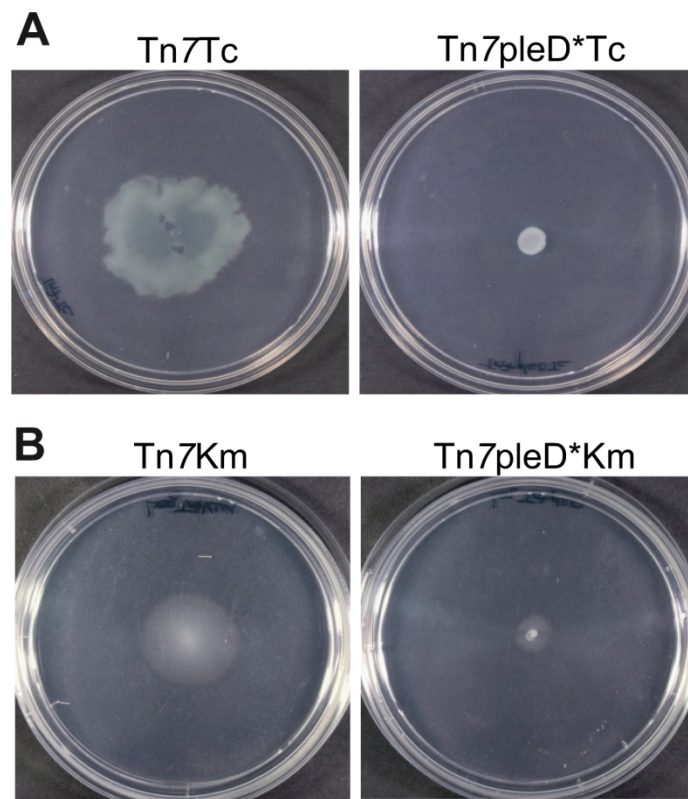

**Figure S3. Motility reduction in mini-Tn7pleD\* strains.** (A) Surface motility of *Pto* strains after 24h at 28°C onto semisolid MM plates (see methods). (B) Swimming motility of *Rle* after 72h growing at 28 °C. Pictures show a representative migration zone of each strain. At least three motility plates from three independent cultures per strain were used.

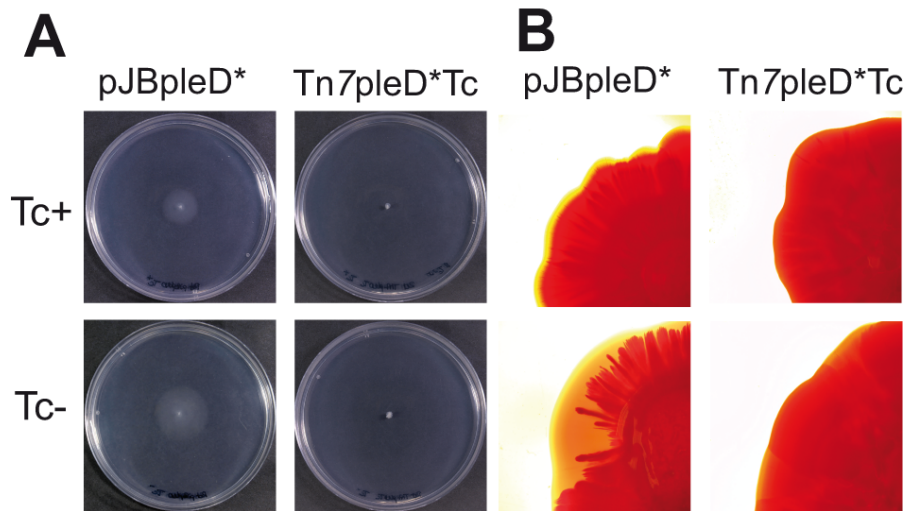

**Figure S4. Stability of mini-Tn7pleD\* in *Rhizobium etli* CFN42 (Ret) under non selective conditions.** Ret strains with a plasmid-encoded (pJBpleD\*) or chromosomally integrated *pleD\** gene (Tn7pleD\*Tc), were assayed for A) swimming motility or B) exopolysaccharide production by Congo Red (CR) staining in the presence and absence of tetracycline. (A) Swimming plates were imaged after 120 h at 28 °C in semisolid Bromfield medium. (B) Colonies imaged after growth on solid MM plates supplemented with CR; 125 µg/ml, at 28°C for 120 h. Representative pictures of at least three different plates from three independent cultures of each strain are shown.

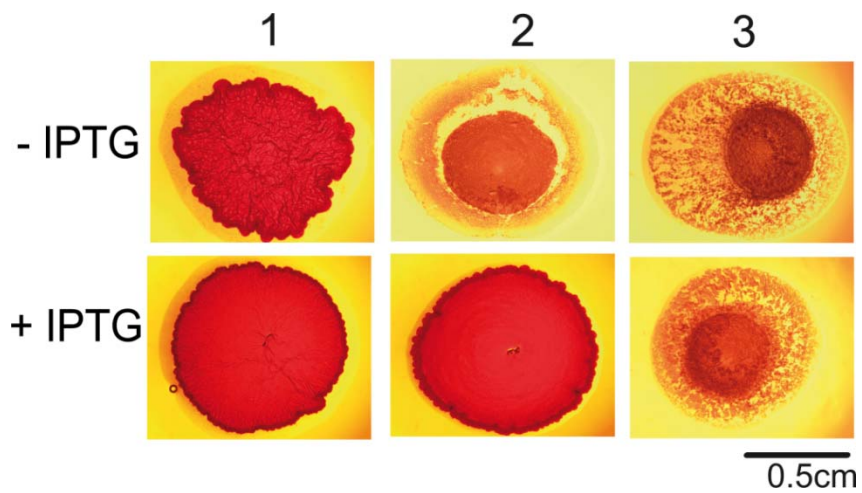

**Figure S5. Control expression of *pleD*\* by *lacI*<sup>q</sup>/IPTG.** Colony morphology of *S. meliloti* (Sme) after two days growth on MM plates supplemented with Congo Red (CR), with and without the inducer IPTG (1mM): Sme Tn7*pleD*\*Km pBBR1MCS5 (1), Sme Tn7*pleD*\*Km pBBR*lacI*<sup>q</sup> (2) and Sme Tn7Km (3). Scale bar is depicted. Representative pictures of at least three different plates from three independent cultures of each strain are shown.



## References of additional material

1. Quinto C, De L, V, Flores M, Leemans J, Cevallos MA, Pardo MA, Azpiroz R, De Lourdes GM, Calva E, Palacios R: **Nitrogenase reductase: A functional multigene family in *Rhizobium phaseoli***. *ProcNatlAcadSciUSA* 1985, **82**(4):1170-1174.
2. Leyva A, Palacios JM, Mozo T, Ruiz-Argueso T: **Cloning and characterization of hydrogen uptake genes from *Rhizobium leguminosarum***. *JBacteriol* 1987, **169**(11):4929-4934.
3. Pellock BJ, Teplitski M, Boinay RP, Bauer WD, Walker GC: **A LuxR homolog controls production of symbiotically active extracellular polysaccharide II by *Sinorhizobium meliloti***. *Journal of bacteriology* 2002, **184**(18):5067-5076.
4. Cuppels DA: **Generation and Characterization of Tn5 Insertion Mutations in *Pseudomonas syringae* pv. tomato**. *ApplEnvironMicrobiol* 1986, **51**(2):323-327.
5. Demarre G, Guerout AM, Matsumoto-Mashimo C, Rowe-Magnus DA, Marliere P, Mazel D: **A new family of mobilizable suicide plasmids based on broad host range R388 plasmid (IncW) and RP4 plasmid (IncPalpha) conjugative machineries and their cognate *Escherichia coli* host strains**. *ResMicrobiol* 2005, **156**(2):245-255.
6. Blatny JM, Brautaset T, Winther-Larsen HC, Haugan K, Valla S: **Construction and use of a versatile set of broad-host-range cloning and expression vectors based on the RK2 replicon**. *ApplEnvironMicrobiol* 1997, **63**(2):370-379.
7. Pérez-Mendoza D, Aragon IM, Prada-Ramírez HA, Romero-Jiménez L, Ramos C, Gallegos MT, Sanjuán J: **Responses to elevated c-di-GMP levels in mutualistic and pathogenic plant-interacting bacteria**. *PloS one* 2014, **9**(3):e91645.
8. Choi KH, Gaynor JB, White KG, Lopez C, Bosio CM, Karkhoff-Schweizer RR, Schweizer HP: **A Tn7-based broad-range bacterial cloning and expression system**. *NatMethods* 2005, **2**(6):443-448.
9. Bao Y, Lies DP, Fu H, Roberts GP: **An improved Tn7-based system for the single-copy insertion of cloned genes into chromosomes of gram-negative bacteria**. *Gene* 1991, **109**(1):167-168.
10. Dennis JJ, Zylstra GJ: **Plasposons: modular self-cloning minitransposon derivatives for rapid genetic analysis of gram-negative bacterial genomes**. *ApplEnvironMicrobiol* 1998, **64**(7):2710-2715.
11. Kovach ME, Elzer PH, Hill DS, Robertson GT, Farris MA, Roop RM, Peterson KM: **Four new derivatives of the broad-host-range cloning vector pBBR1MCS, carrying different antibiotic-resistance cassettes**. *Gene* 1995, **166**(1):175-176.
